# Supplementary material
Source: publisher figshare collection journal article supplement (https://gsajournals.figshare.com/articles/dataset/_/7996325)
Supplement: Supplementary file 1 [file 1]

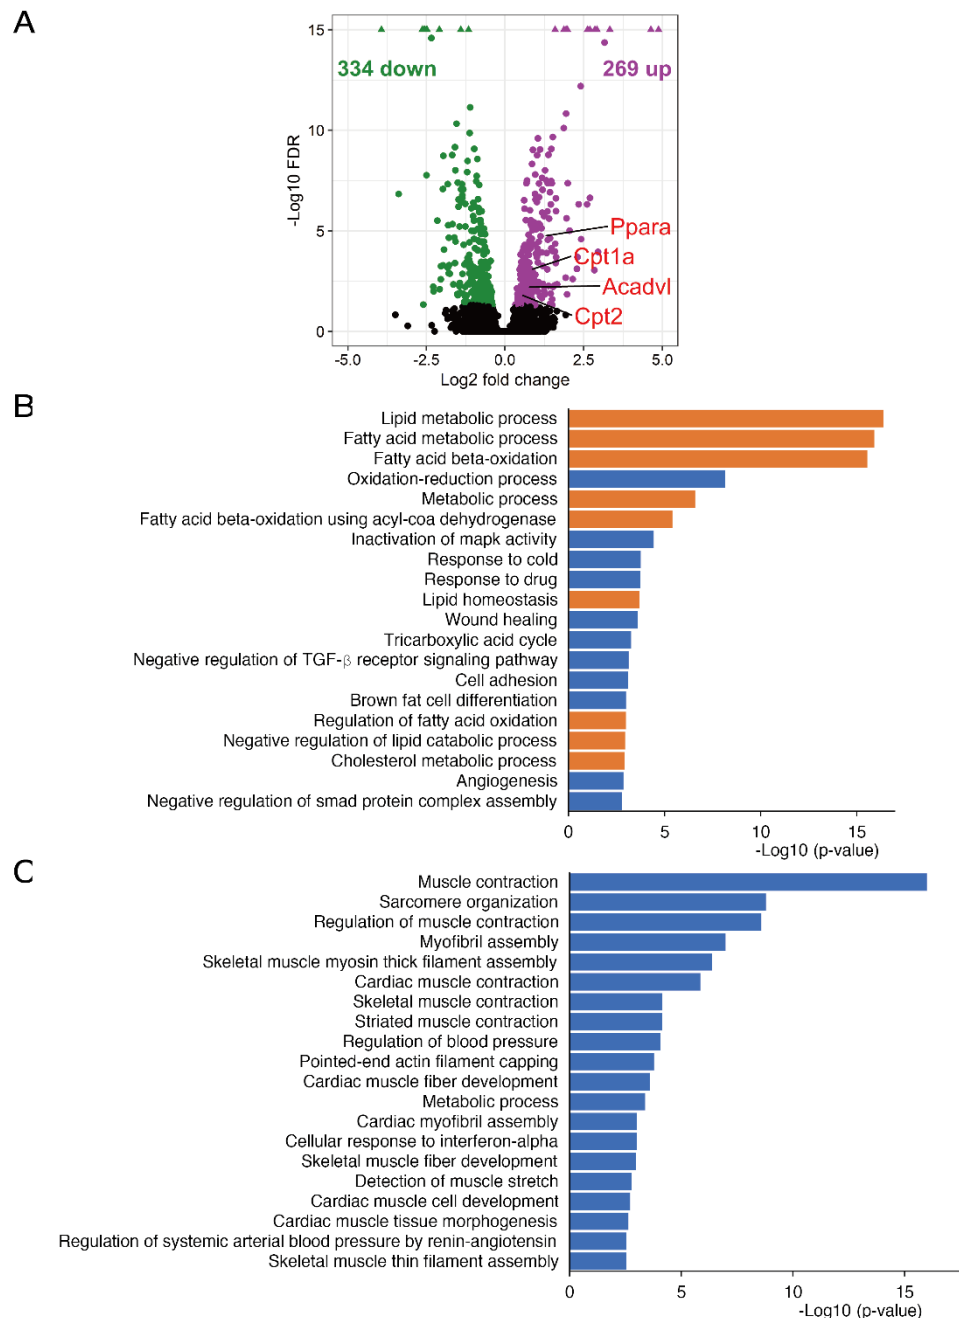

**Figure S1** Effects of LPD on gene expression pattern in the iWAT of F0 male mice at 10–12 weeks of age. (A) Volcano plot of the LPD-induced differentially expressed genes ( $n = 603$ ) in iWAT. LPD upregulated 269 genes (purple spots) and downregulated 334 genes (blue spots) ( $FDR < 0.05$ ). Four representative fatty acid  $\beta$ -oxidation genes are shown. (B and C) Representative GO biological process (BP) terms for the up- and down-regulated genes, respectively ( $P < 0.05$ ). Only the top 20 GO-BP terms are shown. Y-axis:

names of the BP terms; x-axis:  $-\log_{10}$  ( $P$ -value). The up-regulated gene list is mainly enriched in genes involved in metabolic processes, in which the functional subgroup was fatty acid  $\beta$ -oxidation (orange bar) (B), and many of the down-regulated genes are involved in muscle contraction and development (C).
